# Supplementary material for: SARS-CoV-2 direct cardiac damage through spike-mediated cardiomyocyte fusion
Source: Research Square preprint supplement (doi:10.21203/rs.3.rs-95587/v1), 2020-10-30

# Extended Data Figure 1

a

Clinical vignette:  
A 35 year-old healthy Hispanic woman, 3 months postpartum, died suddenly at home following one week of mild viral syndrome signs and symptoms that included lightheadedness. Postmortem nasal swab confirmed acute SARS-CoV-2 infection by RT-PCR and serology demonstrated anti-spike glycoprotein IgG antibodies. At autopsy, the medical examiner discovered fulminant lymphocytic myocarditis with mild congestive heart failure but no pneumonia. Cause of death: arrhythmia.

b

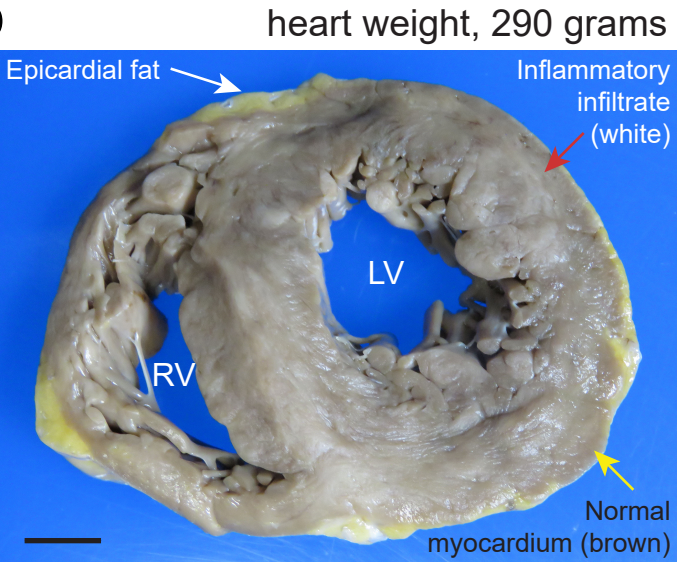

c

H&E

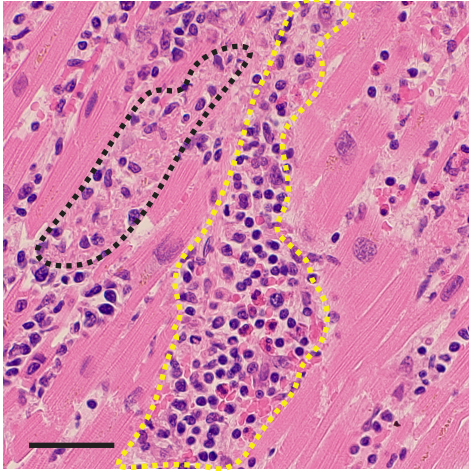

d

CD3

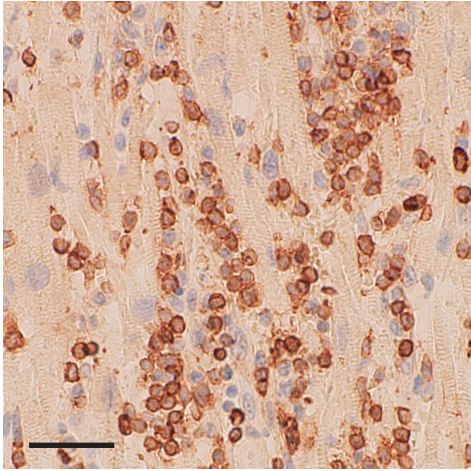

e

CD68

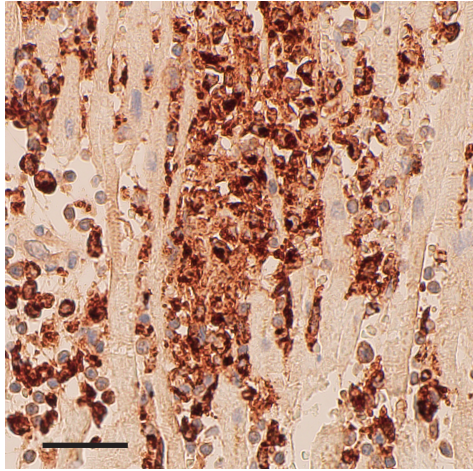

f

Nucleocapsid MYL2 DAPI

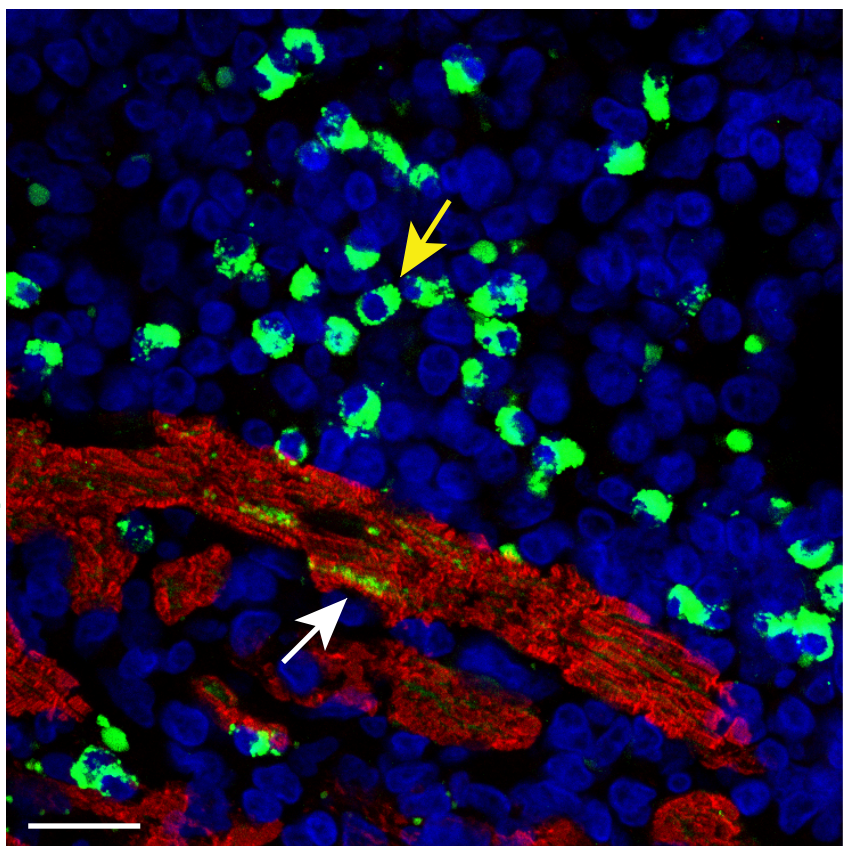

Supplement: Supplementary file 2 [file ced9e261cdcb37d06fb357ea.pdf]
