# Supplementary figures and images for: SARS-CoV-2 direct cardiac damage through spike-mediated cardiomyocyte fusion
Source: Research Square preprint supplement (doi:10.21203/rs.3.rs-95587/v1), 2020-10-30

# Extended Data Figure 5

## a SARS-CoV-2 hiPSC-CMs

a

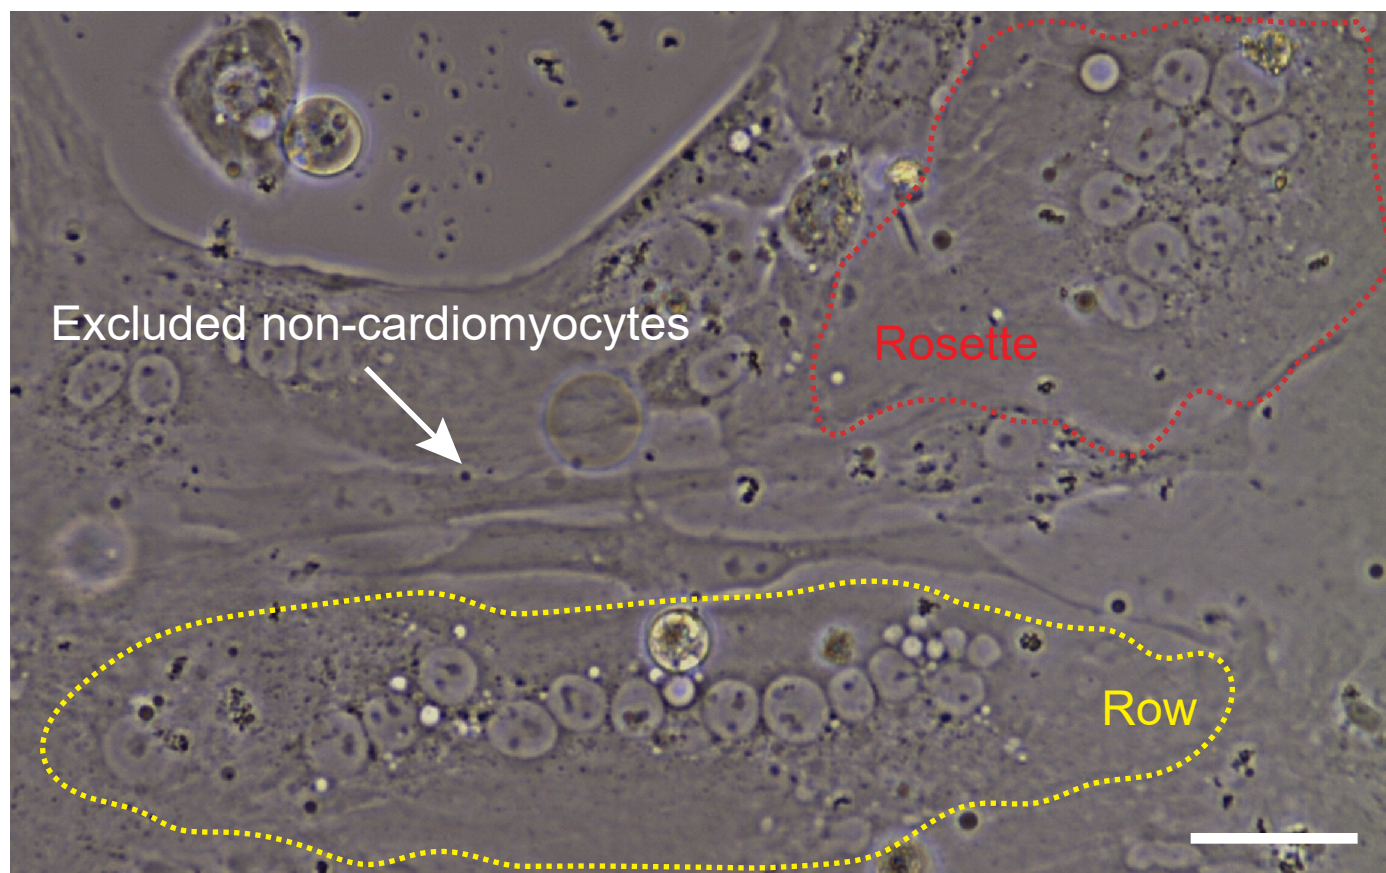

b

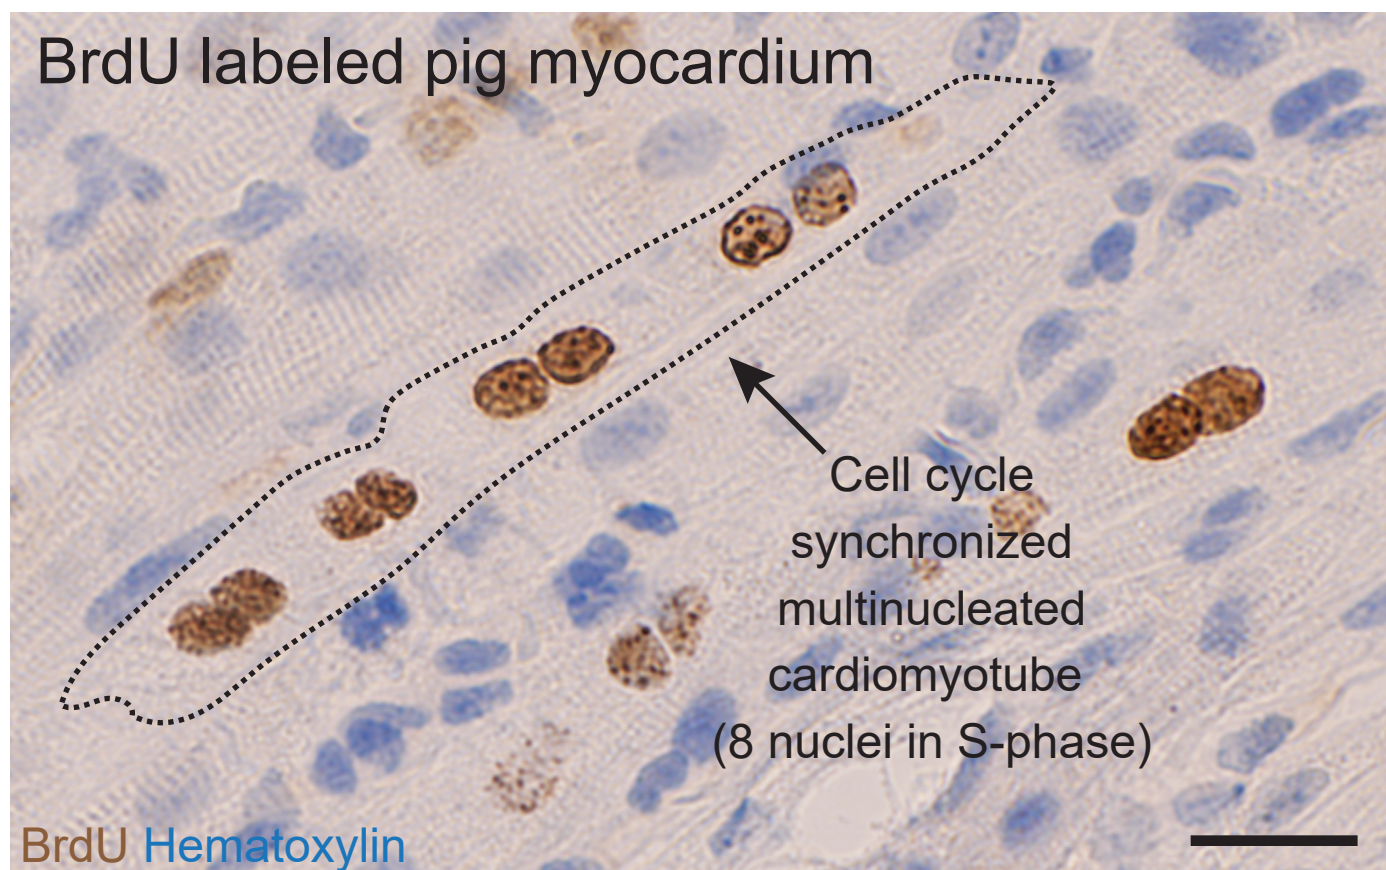

Supplement: Supplementary file 1 [file 0d696475bbb7f52049edc708.pdf]
